# Supplementary material for: Surface functionality density regulated in situ reduction of nanosilver on hierarchial wrinkled mesoporous silica nanoparticles and their antibacterial activity
Source: PubMed Central journal article supplement — RSC Adv. 2018 May 25;8(35):19420–5. doi: 10.1039/c8ra02903b (PMC9080645; doi:10.1039/c8ra02903b), 2018-05-25
Supplement: RA-008-C8RA02903B-s001.pdf [file RA-008-C8RA02903B-s001.pdf]

## **Supporting Information**

### **Surface Functionality Density Regulated In-Situ Reduction of Nanosilver on Hierarchical Wrinkled Mesoporous Silica Nanoparticles and Their Antibacterial Activity**

Xuejuan Wan\*, Lisi Wu, Hang Pei, Haoqi Ke, Guanghui Yang\* and Jiaoning Tang

Shenzhen Key Laboratory of Polymer Science and Technology, College of Materials  
Science and Engineering, Shenzhen University, Shenzhen 518060, China

\*Corresponding author. Tel. and Fax: 86-55-26530649, E-mail address:  
wanxj@szu.edu.cn; sabinyang@163.com

### Instruments and characterization process

High resolution transmission electron microscopic (HRTEM) and scanning electron microscopic (SEM) images of the obtained samples are taken on a JEOL-3000F electron microscope and a Hitachi-S4800FESEM. Powder X-ray diffraction (XRD) patterns are recorded on an X-ray diffractometer (D8 ADVANCE SS, Germany) with monochromated Cu-K $\alpha$  radiation ( $\lambda=1.54060$  Å) at a scanning rate of  $5.0^\circ \text{ min}^{-1}$ . The Brunauer-Emmett-Teller (BET) surface area is determined by nitrogen adsorption and desorption using a specific surface area analyzer (Micromeritics ASAP 2020, USA). Using the Barrett-Joyner-Halenda (BJH) model, the pore volumes and pore size distributions are derived from the desorption branches of isotherms. The weight content of Ag NPs in the obtained samples is measured by an inductively coupled plasma mass spectrometer (ICP-MS, XSeries7, USA). The content of amino groups on the surface of WMSs was determined by the argentometric titration with 0.1 N AgNO<sub>3</sub> following neutralization with HCl.<sup>1</sup>

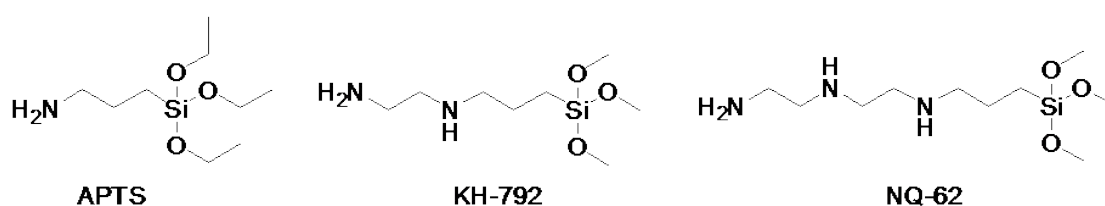

**Figure S1.** The structural formulas of APTES, KH-792 and NQ-62.

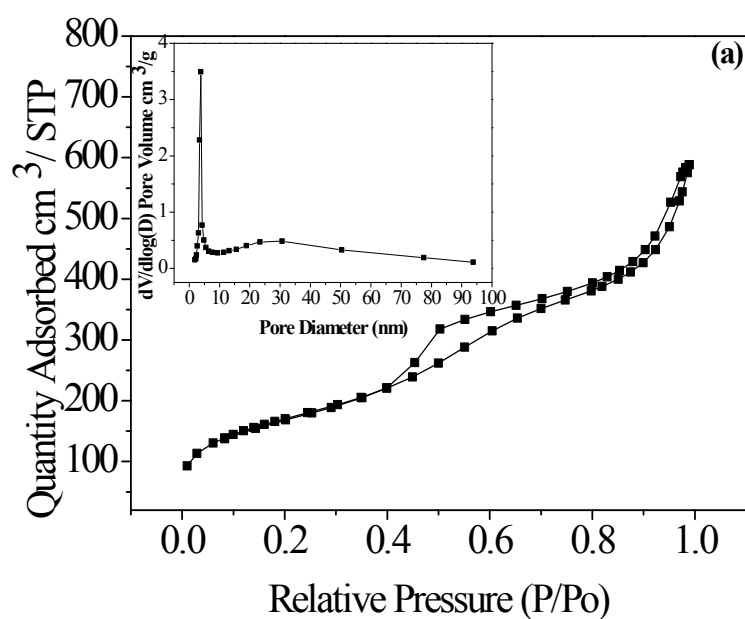

**Figure S2.**  $N_2$  absorption/desorption isotherms and pore size distribution of WMSs-N nanoparticles.

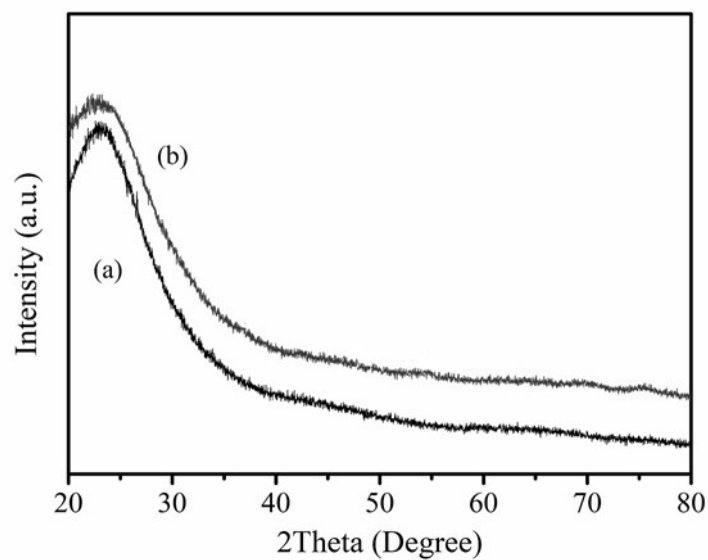

**Figure S3.** XRD patterns obtained for (a) Ag@WMSs-N and (b) WMSs-N nanoparticles.

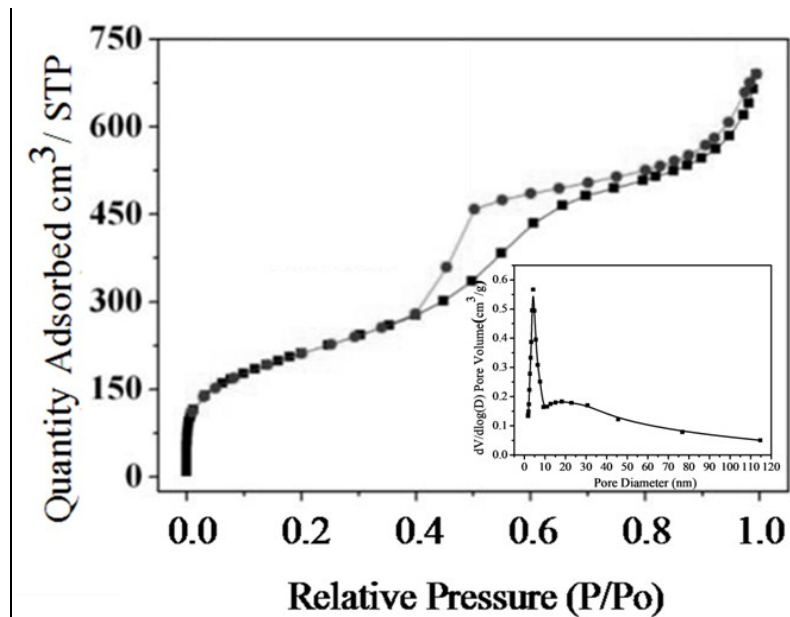

**Figure S4.**  $N_2$  absorption/desorption isotherms and pore size distribution of WMSs-NN nanoparticles.

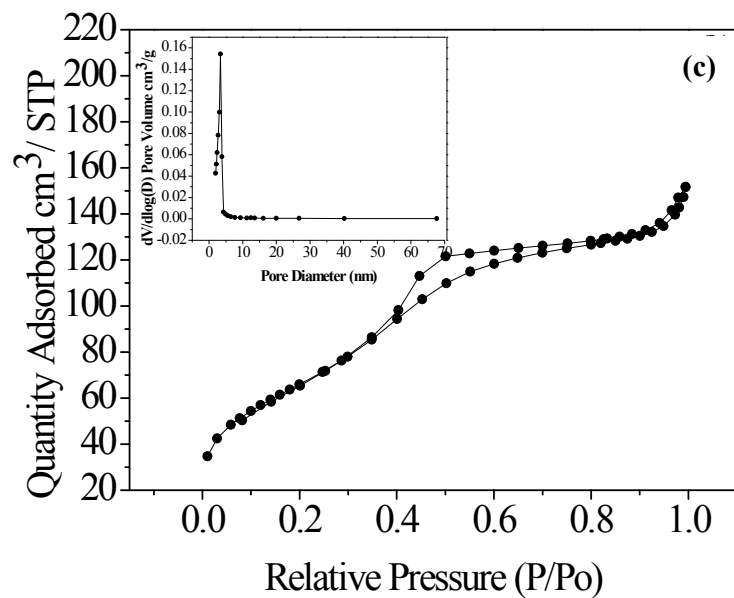

**Figure S5.**  $N_2$  absorption/desorption isotherms and pore size distribution of WMSs-NNN nanoparticles.

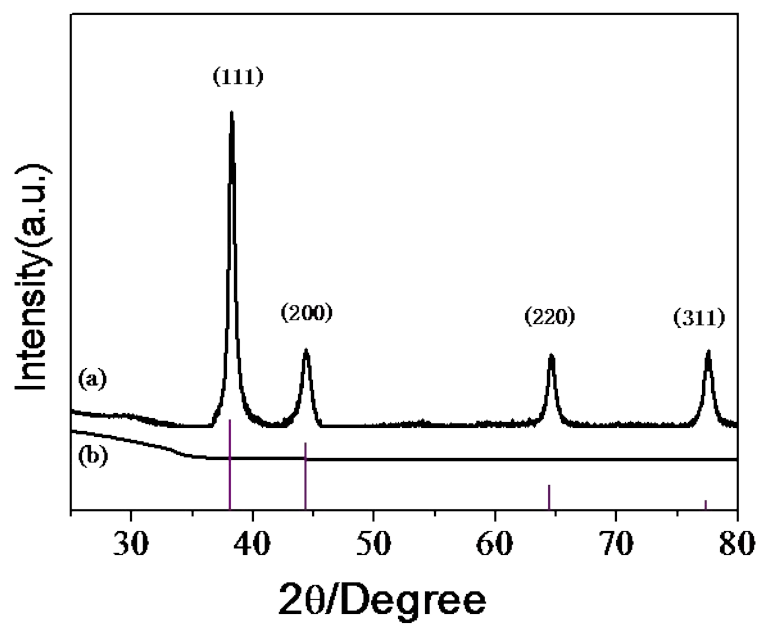

**Figure S6.** XRD patterns obtained for (a) Ag@WMSs-N2 and (b) WMSs-N2 nanoparticles.

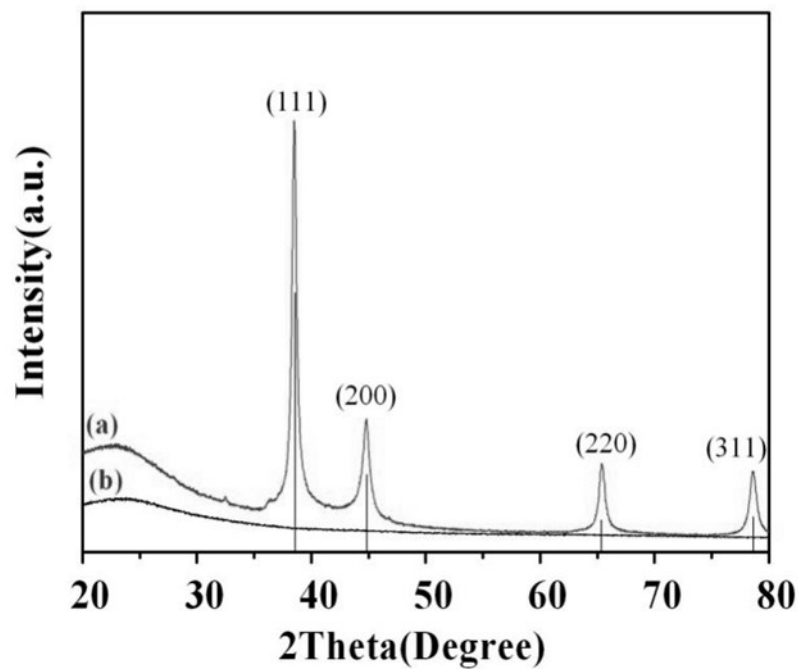

**Figure S7.** XRD patterns obtained for (a) Ag@WMSs-NN and (b) WMSs-NN nanoparticles.

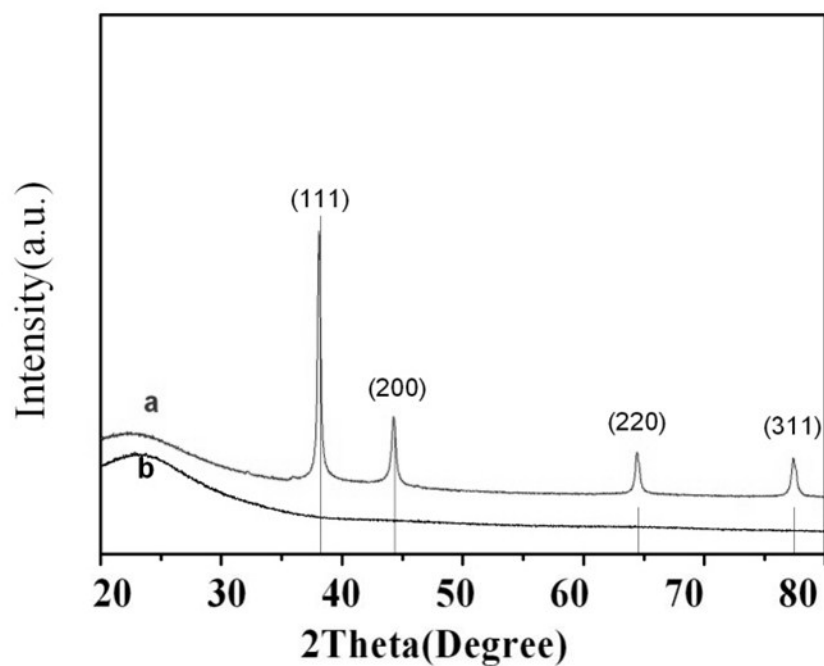

**Figure S8.** XRD patterns obtained for (a) Ag@WMSs-NNN and (b) WMSs-NNN nanoparticles.

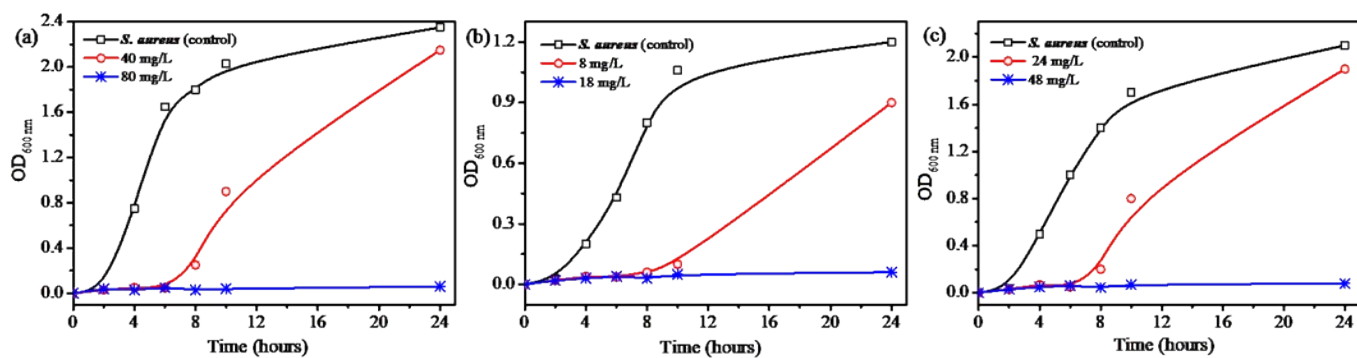

**Figure S9.** Concentration effects for the bacterial growth with the addition of Ag@WMSs-N2 (a), Ag@WMSs-NN (b) and Ag@WMSs-NNN (c) toward *S.aureus*.

**Table S1.** Structural properties of WMSs-N, WMSs-N2, WMSs-NN and WMSs-NNN nanoparticles.

| Sample   | Surface area                   | Pore volume                     | Amino group <sup>a</sup> |                  |
|----------|--------------------------------|---------------------------------|--------------------------|------------------|
|          | m <sup>2</sup> g <sup>-1</sup> | cm <sup>3</sup> g <sup>-1</sup> | mmol g <sup>-1</sup>     | nm <sup>-2</sup> |
| WMSs-N   | 602.32                         | 0.91                            | 0.47                     | 0.47             |
| WMSs-N2  | 525.98                         | 0.97                            | 0.90                     | 1.03             |
| WMSs-NN  | 768.83                         | 1.03                            | 1.66                     | 1.31             |
| WMSs-NNN | 241.83                         | 0.23                            | 0.36                     | 0.86             |

<sup>a</sup>The content of amino groups on the surface of WMSs was determined by the argentometric titration using 0.1 N AgNO<sub>3</sub>. The surface density of amino groups was based on the surface area of WMSs.

**Table S2.** Comparison of the MIC and MBC values of Ag@WMSs obtained in our work and the reported others.

| Sample                 | <i>E. coli</i>               |                              | <i>S. aureus</i>             |                              | References |
|------------------------|------------------------------|------------------------------|------------------------------|------------------------------|------------|
|                        | MIC<br>(mg L <sup>-1</sup> ) | MBC<br>(mg L <sup>-1</sup> ) | MIC<br>(mg L <sup>-1</sup> ) | MBC<br>(mg L <sup>-1</sup> ) |            |
| Ag@WMSs-N2             | 40                           | 96                           | 80                           | 108                          | This work  |
| Ag@WMSs-NN             | 24                           | 48                           | 48                           | 96                           |            |
| Ag@WMSs-NNN            | 12                           | 24                           | 18                           | 36                           |            |
| Ag-HeiQ AGS-20         | 62                           | \                            | 250                          | \                            | Ref. 31    |
| Ag-SiO <sub>2</sub> -3 | 300                          | \                            | 500                          | \                            | Ref. 32    |
| CaMSS-0.5N-Ag          | 100                          | \                            | \                            | \                            | Ref. 24    |
| Ag-MSNs                | 80                           | \                            | 320                          | \                            | Ref. 22    |

## Reference:

1. T. Yokoi, H. Yoshitake and T. Tatsumi, *J Mater Chem*, 2004, **14**, 951-957.
